# Supplementary material
Source: PubMed Central journal article supplement (PMC4485150)
Supplement: pnas.1501540112.sapp.pdf [file pnas.1501540112.sapp.pdf]

Supplementary information for *Mosaic genome of endobacteria in arbuscular mycorrhizal fungi: trans-kingdom gene transfer in an ancient mycoplasma-fungus association*

Gloria Torres-Cortés, Stefano Ghignone, Paola Bonfante and Arthur Schüßler

Supporting Online Material

Table of Contents

**1. MATERIAL AND METHODS** (Text S1)

- 1.1. Endobacteria DNA extraction for sequencing
- 1.2. Semiquantitative analysis of *DhMRE* phlotypes I and II abundance
- 1.3. Illumina sequencing and assembly
- 1.4. Phylogenetic analyses
- 1.5. Identification of horizontal gene transfer

**2. SUPPLEMENTARY TABLES:** Tables S1 to S7

**3. SUPPLEMENTARY FIGURES:** Figures S1 to S8

**4. REFERENCES**

## Text S1

### 1. MATERIAL AND METHODS

#### 1.1 Endobacteria DNA extraction for sequencing

For *DhMRE* genomic preparation, *Dentiscutata heterogama* spores were crushed in 1 ml extraction buffer (250 mM sucrose, 10 mM MES pH 6.5, 25 mM KCl, 20 mM MgCl<sub>2</sub>, 1 mM dithiothreitol) at 4°C by using a glass homogenizer. The major spore debris was pelleted by centrifugation at 500 g for 2 min, the supernatant was then again centrifuged at 1,000 g for 2 min to remove nuclei and other high density debris. The newly formed supernatant was filtered through an 8 µm and then a 3 µm polycarbonate filter (Whatman). The resulting bacteria suspension was centrifuged at 25,000 g for 15 min to pellet the bacteria; the pellet was re-suspended in re-suspension buffer (10 mM Tris-HCl pH 8, 250 mM sucrose) and treated for 60 min with DNase at 4°C to remove free DNA. After inactivating DNase activity by heat treatment, DNA was extracted with the MasterPure Gram-positive DNA purification kit (Epicentre) according to the manufacturer's recommendations.

#### 1.2 Semiquantitative analysis of *DhMRE* phlotypes I and II abundance

For the semiquantitative analysis of *DhMRE* phlotypes, DNA was extracted from 20 *D. heterogama* spores and from the suspension resulting after the endobacteria DNA extraction protocol. These DNA samples were used in the construction of each clone library. PCR was performed using MRE specific primers and the Phusion High-Fidelity DNA Polymerase (New England Biolabs). PCR products were TOPO cloned (Invitrogen) and transformed into Top10 chemically competent *Escherichia coli*. Colonies were then PCR-screened for phlyotype-specific insert length differences and *RsaI* digestion (phlyotype I); 498 clones were analyzed.

#### 1.3 Illumina sequencing and assembly

Three different sequencing libraries were constructed using the transposon-based Nextera™ DNA Sample Prep Kit (Illumina), with 50 ng of DNA as starting material. One additional

library was produced with the transposon-based Nextera™ XT kit (Illumina). After library production, Illumina sequencing was performed using the Illumina MiSeq platform at the Genomics Service Unit of the Ludwig-Maximilian-University Munich Biocenter, generating  $41 \times 10^6$  paired end 150 bp raw reads.

The paired-end reads were quality trimmed using CLC workbench v5 (CLC Bio), under the default parameters. Trimmed reads were mapped against the main bacterial contaminant genomes, to remove contaminant reads. The remaining, cleaned reads were assembled using the CLC de novo assembly algorithm, with a kmer size of 23, resulting in 3,655 contigs, which were then filtered according to two criteria: all contigs that had a G+C content  $> 45\%$  and a coverage  $< 20$  were discarded. This resulted in 119 contigs (1.17 Mb; *SI Appendix*, Table S1) used for further analyses. To identify the putative *DhMRE* sequences from the resulting 119 contigs we performed BLASTX searches against the NCBI database.

To determine possible contamination by sequences from the fungal host, raw reads obtained after *DhMRE* spore metagenome sequencing were mapped ( $>60\%$  identity in 0.5 of sequence length) against the published *Rhizophagus irregularis* genome assembly (1), with only 0.18% of the reads mapping to it.

To further validate the CLC assembly, two additional strategies were followed. Firstly, raw data reads were mapped against the scaffolds with 90 % sequence similarity and length coverage as criteria, using CLC Genomics v. 5.2. Areas with low coverage were also included and manually inspected. Secondly, we tracked and visualized the paired-end connections between scaffolds, following the instructions of Albertsen *et al.* (2) and cytoscape for the visualization (3).

To identify the hypothesized existence of divergent genomes we carried out BLAST searches of putative *DhMRE* contigs against the total of all contigs obtained. We could not identify any contigs with  $> 75\%$  identity for  $> 1,500$  bp length with the query, indicating that the

assembled data are not composed of multiple closely related genomes. To analyze the expected presence of both 16S rRNA gene phylotypes in the raw reads, we mapped the raw data against both major 16S phylotypes known from Sanger sequencing approaches, but we mainly identify one of them (only 24 reads in total mapped the phylotype II; Fig. S4). To exclude the possibility of reads belonging to different phylotypes binding together in the assembly, a QualitySNPng analysis (4) was performed on the contig containing the 16S rRNA gene.

In addition to these analyses, an additional assembly was done with MIRA (5). Using this approach, we obtained the same sequence information as with the CLC assembly, but with a higher fragmentation.

Correlations between Z-scores of tetranucleotide composition were assessed using TETRA (6). For the circular and linear representation of the scaffolds the software DNAPlotter was used (7).

#### **1.4 Phylogenetic analyses**

To study *DhMRE* proteins candidate for HGT by phylogenetic analyses, homologous sequences were selected after BLAST searches. For this, 40 BLASTP hits were selected for each *DhMRE* query protein, represented by the five best BLASTP hits of the i) non-redundant protein sequences (nr) database from the NCBI ii) -nr database excluding *R. irregularis* iii) -nr database including fungi sequences only, but excluding *R. irregularis* and iv) -nr database including bacteria sequences only. Redundant hits were removed.

#### **1.5 Identification of horizontal gene transfer**

BLASTP analyses of the *DhMRE* proteome against the non-redundant protein sequences (nr) database from the NCBI using the software Blast2GO were conducted to identify protein sequences with similarity to proteins from the AMF *R. irregularis*, which lacks endobacteria. BLASTP affiliation was based on the best-hit with a cut-off value of  $e^{-03}$ . Eukaryotic domains

were identified by analyzing the results obtained in Interpro and SUPERFAMILY databases integrated in MicroScope platform (8). The presence of genomic islands in the *DhMRE* genome draft was studied using the software IslandViewer.

## 2. SUPPLEMENTARY TABLES

**Table S1.** Metagenome assembly data.

|                               |                                          |                      |
|-------------------------------|------------------------------------------|----------------------|
| <b>Raw data</b>               | Reads (bp)                               | 2x150                |
|                               | No. of reads                             | 41x10 <sup>6</sup>   |
|                               | Primary sequence data (Gb)               | 6                    |
| <b>Cleaned data</b>           | No. of reads                             | 15.8x10 <sup>6</sup> |
|                               | Contigs sequence data Mb-No. of contigs  | 15/3655              |
|                               | No. of contigs with G+C < 45%            | 1494                 |
|                               | No. contigs G+C < 45% and coverage > 20  | 119                  |
|                               | Cleaned sequence data (Mb)               | 1.17                 |
| <b><i>Dh</i>MRE sequences</b> | <i>Dh</i> MRE sequence data              | 0.702                |
|                               | No. of <i>Dh</i> MRE contigs             | 24                   |
|                               | Average <i>Dh</i> MRE contig length (bp) | 29,244               |
|                               | <i>Dh</i> MRE average coverage           | 172x                 |
|                               | N50 contig size (bp)                     | 147,306              |
|                               | Longest scaffold (bp)                    | 222,151              |

Contigs recovered after removing the main contaminants from the raw data were filtered according to GC content and coverage. All contigs presenting a G+C content higher than 45% and coverage below 20 were discarded. *Dh*MRE contigs were identified from the resulting contigs performing BLASTX searches against NCBI non-redundant protein sequences database.

**Table S2.** Genome features of *DhMRE* in comparison to members of the *Tenericutes* and *Firmicutes*.

|                                               | <i>DhMRE</i> |          |        | <i>Tenericutes</i> |          |          |       | <i>Firmicutes</i> |      |          |
|-----------------------------------------------|--------------|----------|--------|--------------------|----------|----------|-------|-------------------|------|----------|
|                                               | Sca.A        | Sca. B   | Sca. C | Mgen               | Upar     | Mhyo     | Mflo  | CaPhy             | Linn | Saga     |
| <b>Length</b><br>(Mb)                         | 0.649        | 0.0604   | 0.0038 | 0.580              | 0.752    | 0.840    | 0.793 | 0.602             | 3.01 | 2.13     |
| <b>G+C</b><br><b>ratio</b>                    | 34.06        | 32.3     | 34.06  | 32                 | 25       | 25.88    | 27.02 | 21.39             | 37.4 | 35.65    |
| <b>CDS<sup>a</sup></b>                        | 606          | 58       | 6      | 482                | 613      | 663      | 683   | 482               | 3141 | 2196     |
| <b>Coding</b><br><b>region<sup>b</sup></b>    | 80.96        | 83.69    | 57.13  | 92.14              | 93       | 85.3     | 93.3  | 78.75             | 89.3 | 86.8     |
| <b>RNA</b><br><b>operons</b>                  | 1            | 0        | 0      | 1                  | 1        | 1        | 2     | 2                 | 6    | 7        |
| <b>tRNAs</b>                                  | 35           | 0        | 0      | 36                 | 39       | 30       | 29    | 32                | 66   | 80       |
| <b>Lifestyle</b><br><b>(Host)<sup>c</sup></b> |              | O<br>(F) |        | P<br>(A)           | P<br>(A) | P<br>(A) | FL    | P<br>(Pl)         | FL   | P<br>(A) |

<sup>a</sup> Number of protein-coding sequences in the corresponding scaffold/chromosome.

<sup>b</sup> Percentage of coding regions in the total scaffold/chromosome.

<sup>c</sup> Lifestyle of local taxa; O: obligate endosymbiont; P: pathogen; FL: free-living; F: fungi; A: animal; Pl: plants.

Data for Mgen, Upar, Mhyo, Mflo and CaPhy were obtained from the Molligen (9) database and for Linn and Saga from the Microscope database (8) under the following accession numbers: Mgen: *Mycoplasma genitalium* G37 (NC\_000908); Upar: *Ureaplasma parvum* serovar 3 ATCC 700970 (NC\_002162); Mhyo: *Mycoplasma hyorhinis* HUB-1 (CP002170); Mflo: *Mesoplasma florum* L1 (NC\_006055); CaPhy: *Ca. Phytoplasma mali* (NC\_011047); Linn: *Listeria innocua* (NC\_003212); Saga: *Streptococcus agalactiae* A909 (NC\_007432). Sca.A, B and C: Scaffold A, B and C from *DhMRE* draft genome.

**Table S3.** Pearson correlation coefficients for Z-score of tetranucleotide frequency.

|                   | <i>DhMRE</i><br>A | <i>DhMRE</i><br>B | Mgen | Upar | Mhyo | Mflo | CaPhy | Linn | Saga | Rirr 523 | Rirr<br>4192 | Dacid |
|-------------------|-------------------|-------------------|------|------|------|------|-------|------|------|----------|--------------|-------|
| <i>DhMRE</i><br>A | 1                 |                   |      |      |      |      |       |      |      |          |              |       |
| <i>DhMRE</i><br>B | <b>0.89</b>       | 1                 |      |      |      |      |       |      |      |          |              |       |
| Mgen              | 0.59              | 0.52              | 1    |      |      |      |       |      |      |          |              |       |
| Upar              | 0.55              | 0.50              | 0.66 | 1    |      |      |       |      |      |          |              |       |
| Mhyo              | 0.43              | 0.38              | 0.47 | 0.83 | 1    |      |       |      |      |          |              |       |
| Mflo              | 0.41              | 0.35              | 0.60 | 0.80 | 0.83 | 1    |       |      |      |          |              |       |
| CaPhy             | 0.56              | 0.50              | 0.65 | 0.86 | 0.80 | 0.80 | 1     |      |      |          |              |       |
| Linn              | 0.65              | 0.61              | 0.58 | 0.70 | 0.69 | 0.71 | 0.74  | 1    |      |          |              |       |
| Saga              | 0.65              | 0.61              | 0.68 | 0.65 | 0.59 | 0.71 | 0.74  | 0.83 | 1    |          |              |       |
| Rirr 523          | 0.33              | 0.25              | 0.34 | 0.48 | 0.55 | 0.53 | 0.56  | 0.48 | 0.43 | 1        |              |       |
| Rirr<br>4192      | 0.43              | 0.38              | 0.36 | 0.62 | 0.65 | 0.62 | 0.64  | 0.51 | 0.46 | 0.65     | 1            |       |
| Dacid             | 0.06              | 0.001             | 0.19 | 0.35 | 0.39 | 0.46 | 0.33  | 0.27 | 0.25 | 0.34     | 0.30         | 1     |

Abbreviations and GenBank accession numbers: *DhMRE*, *Dentiscutata heterogama* MRE scaffold; Mgen, *Mycoplasma genitalium* G37 (NC\_000908); Upar, *Ureaplasma parvum* serovar 3 ATCC 700970 (NC\_002162); Mhyo, *Mycoplasma hyorhinis* HUB-1 (CP002170); Mflo, *Mesoplasma florum* L1 (NC\_006055.1); CaPhy, *Candidatus Phytoplasma mali* (NC\_011047); Linn, *Listeria innocua* (NC\_003212); Saga, *Streptococcus agalactiae* (NC\_007432); Rirr, *R. irregularis* scaffold (523 = KE392324; 4192 = KE392320); Daci, *Delftia acidovorax* (NC\_010002). The tetranucleotide correlation between the *DhMRE* scaffolds A and B is marked in bold.



**Table S4.** Analysis of the proportion of different phylotypes found in *D. heterogama* spores, and in the bacterial suspension resulting after the MRE DNA extraction protocol, through clone libraries.

|                                      |                              | Phylotype 1  |           | Phylotype 2  |           | Total Number |
|--------------------------------------|------------------------------|--------------|-----------|--------------|-----------|--------------|
|                                      |                              | Clone number | %         | Clone number | %         |              |
| <b>Spores</b>                        | Spore Clone library 1        | 74           | 86        | 12           | 14        | 86           |
|                                      | Spore Clone library 2        | 68           | 78        | 19           | 22        | 87           |
|                                      | Spore Clone library 3        | 74           | 90        | 8            | 10        | 82           |
|                                      | Spore Clone library 4        | 61           | 77        | 18           | 23        | 79           |
|                                      | <b>TOTAL SPORES</b>          | <b>277</b>   | <b>83</b> | <b>57</b>    | <b>17</b> | <b>334</b>   |
| <b>After DNA extraction protocol</b> | MRE Clone library 1          | 78           | 95        | 4            | 5         | 82           |
|                                      | MRE Clone library 2          | 79           | 96        | 3            | 4         | 82           |
|                                      | <b>TOTAL MRE preparation</b> | <b>157</b>   | <b>96</b> | <b>7</b>     | <b>4</b>  | <b>164</b>   |

**Table S5.** List of housekeeping genes and species used for the multilocus analysis.

|                                     |                    |                   |                          | <i>infB</i> | <i>rplN</i> | <i>rplO</i> | <i>rplP</i> | <i>rpoB</i> | <i>rpsC</i> | <i>rpsD</i> | <i>rpsE</i> | <i>rpsH</i> | <i>rpsM</i> | Total Length (aa) |
|-------------------------------------|--------------------|-------------------|--------------------------|-------------|-------------|-------------|-------------|-------------|-------------|-------------|-------------|-------------|-------------|-------------------|
|                                     | <b>Phylum</b>      | <b>Class</b>      | <b>Order</b>             |             |             |             |             |             |             |             |             |             |             |                   |
| <b>DhMRE</b>                        | <i>Tenericutes</i> | <i>Mollicutes</i> | <i>Mycoplasmatales</i>   | <b>P</b>    | 3224              |
| <i>Ca. Phytoplasma asteris</i> AYWB | <i>Tenericutes</i> | <i>Mollicutes</i> | <i>Acholeplasmatales</i> | <b>P</b>    | 3192              |
| <i>Ca. Phytoplasma asteris</i> OY-M | <i>Tenericutes</i> | <i>Mollicutes</i> | <i>Acholeplasmatales</i> | <b>P</b>    | 3101              |
| <i>Ca. Phytoplasma australiense</i> | <i>Tenericutes</i> | <i>Mollicutes</i> | <i>Acholeplasmatales</i> | <b>P</b>    | 3138              |
| <i>Ca. Phytoplasma mali</i>         | <i>Tenericutes</i> | <i>Mollicutes</i> | <i>Acholeplasmatales</i> | <b>P</b>    | 3170              |
| <i>Acholeplasma laidlawii</i>       | <i>Tenericutes</i> | <i>Mollicutes</i> | <i>Acholeplasmatales</i> | <b>P</b>    | 3174              |
| <i>Mesoplasma florum</i>            | <i>Tenericutes</i> | <i>Mollicutes</i> | <i>Entomoplasmatales</i> | <b>P</b>    | 3222              |
| <i>Spiroplasma citri</i>            | <i>Tenericutes</i> | <i>Mollicutes</i> | <i>Entomoplasmatales</i> | <b>P</b>    | 3231              |
| <i>Spiroplasma melliferum</i>       | <i>Tenericutes</i> | <i>Mollicutes</i> | <i>Entomoplasmatales</i> | <b>P</b>    | 3232              |
| <i>Mycoplasma bovis</i>             | <i>Tenericutes</i> | <i>Mollicutes</i> | <i>Mycoplasmatales</i>   | <b>P</b>    | 3118              |
| <i>Mycoplasma synoviae</i>          | <i>Tenericutes</i> | <i>Mollicutes</i> | <i>Mycoplasmatales</i>   | <b>P</b>    | 3040              |
| <i>Mycoplasma agalactiae</i>        | <i>Tenericutes</i> | <i>Mollicutes</i> | <i>Mycoplasmatales</i>   | <b>P</b>    | 3118              |
| <i>Mycoplasma mobile</i>            | <i>Tenericutes</i> | <i>Mollicutes</i> | <i>Mycoplasmatales</i>   | <b>P</b>    | 3115              |
| <i>Mycoplasma haemofelis</i>        | <i>Tenericutes</i> | <i>Mollicutes</i> | <i>Mycoplasmatales</i>   | <b>P</b>    | 3286              |

|                                 |                    |                   |                        |   |   |   |   |   |   |   |   |   |   |      |
|---------------------------------|--------------------|-------------------|------------------------|---|---|---|---|---|---|---|---|---|---|------|
| <i>Mycoplasma leachii</i>       | <i>Tenericutes</i> | <i>Mollicutes</i> | <i>Mycoplasmatales</i> | P | P | P | P | P | P | P | P | P | P | 3256 |
| <i>Mycoplasma hyorhinis</i>     | <i>Tenericutes</i> | <i>Mollicutes</i> | <i>Mycoplasmatales</i> | P | P | P | P | P | P | P | P | P | P | 3171 |
| <i>Mycoplasma gallisepticum</i> | <i>Tenericutes</i> | <i>Mollicutes</i> | <i>Mycoplasmatales</i> | P | P | P | P | P | P | P | P | P | P | 3386 |
| <i>Mycoplasma genitalium</i>    | <i>Tenericutes</i> | <i>Mollicutes</i> | <i>Mycoplasmatales</i> | P | P | P | P | P | P | P | P | P | P | 3368 |
| <i>Mycoplasma hominis</i>       | <i>Tenericutes</i> | <i>Mollicutes</i> | <i>Mycoplasmatales</i> | P | P | P | P | P | P | P | P | P | P | 3142 |
| <i>Mycoplasma arthritidis</i>   | <i>Tenericutes</i> | <i>Mollicutes</i> | <i>Mycoplasmatales</i> | P | P | P | P | P | P | P | P | P | P | 3107 |
| <i>Mycoplasma hyopneumoniae</i> | <i>Tenericutes</i> | <i>Mollicutes</i> | <i>Mycoplasmatales</i> | P | P | P | P | P | P | P | P | P | P | 3109 |
| <i>Mycoplasma conjunctivae</i>  | <i>Tenericutes</i> | <i>Mollicutes</i> | <i>Mycoplasmatales</i> | P | P | P | P | P | P | P | P | P | P | 3102 |
| <i>Mycoplasma mycoides</i>      | <i>Tenericutes</i> | <i>Mollicutes</i> | <i>Mycoplasmatales</i> | P | P | P | P | P | P | P | P | P | P | 3260 |
| <i>Mycoplasma crocodyli</i>     | <i>Tenericutes</i> | <i>Mollicutes</i> | <i>Mycoplasmatales</i> | P | P | P | P | P | P | P | P | P | P | 3147 |
| <i>Mycoplasma capricolum</i>    | <i>Tenericutes</i> | <i>Mollicutes</i> | <i>Mycoplasmatales</i> | P | P | P | P | P | P | P | P | P | P | 3256 |
| <i>Mycoplasma penetrans</i>     | <i>Tenericutes</i> | <i>Mollicutes</i> | <i>Mycoplasmatales</i> | P | P | P | P | P | P | P | P | P | P | 3512 |
| <i>Mycoplasma pulmonis</i>      | <i>Tenericutes</i> | <i>Mollicutes</i> | <i>Mycoplasmatales</i> | P | P | P | P | P | P | P | P | P | P | 3146 |
| <i>Mycoplasma pneumoniae</i>    | <i>Tenericutes</i> | <i>Mollicutes</i> | <i>Mycoplasmatales</i> | P | P | P | P | P | P | P | P | P | P | 3383 |
| <i>Ureaplasma urealyticum</i>   | <i>Tenericutes</i> | <i>Mollicutes</i> | <i>Mycoplasmatales</i> | P | P | P | P | P | P | P | P | P | P | 3382 |
| <i>Lactobacillus plantarum</i>  | <i>Firmicutes</i>  | <i>Bacilli</i>    | <i>Lactobacillales</i> | P | P | P | P | P | P | P | P | P | P | 3187 |
| <i>Streptococcus pneumoniae</i> | <i>Firmicutes</i>  | <i>Bacilli</i>    | <i>Lactobacillales</i> | P | P | P | P | P | P | P | P | P | P | 3383 |
| <i>Lactobacillus crispatus</i>  | <i>Firmicutes</i>  | <i>Bacilli</i>    | <i>Lactobacillales</i> | P | P | P | P | P | P | P | P | P | P | 3185 |
| <i>Listeria monocitogenes</i>   | <i>Firmicutes</i>  | <i>Bacilli</i>    | <i>Bacillales</i>      | P | P | P | P | P | P | P | P | P | P | 3216 |

|                                     |                   |                   |                      |          |          |          |          |          |          |          |          |          |          |          |      |
|-------------------------------------|-------------------|-------------------|----------------------|----------|----------|----------|----------|----------|----------|----------|----------|----------|----------|----------|------|
| <i>Staphylococcus aureus</i>        | <i>Firmicutes</i> | <i>Bacilli</i>    | <i>Bacillales</i>    | <b>P</b> | 3136 |
| <i>Staphylococcus epidermidis</i>   | <i>Firmicutes</i> | <i>Bacilli</i>    | <i>Bacillales</i>    | <b>P</b> | 3151 |
| <i>Bacillus pumilus</i>             | <i>Firmicutes</i> | <i>Bacilli</i>    | <i>Bacillales</i>    | <b>P</b> | 3132 |
| <i>Ca. Desulforudis audaxviator</i> | <i>Firmicutes</i> | <i>Clostridia</i> | <i>Clostridiales</i> | <b>P</b> | 3314 |
| <i>Clostridium kluyveri</i>         | <i>Firmicutes</i> | <i>Clostridia</i> | <i>Clostridiales</i> | <b>P</b> | 3166 |
| <i>Clostridium botulinum</i>        | <i>Firmicutes</i> | <i>Clostridia</i> | <i>Clostridiales</i> | <b>P</b> | 3167 |

Sequences have been retrieved from the Molligen database and from NCBI. Gene abbreviations: *infB*, translation initiation factor IF-2; *rplN*, large subunit ribosomal protein L14; *rplO*, large subunit ribosomal protein L15; *rplP*, large subunit ribosomal protein L16; *rpoB*, DNA-directed RNA polymerase subunit beta; *rpsC*, small subunit ribosomal protein S3; *rpsD*, small subunit ribosomal protein S4; *rpsE*, small subunit ribosomal protein S5; *rpsH*, small subunit ribosomal protein S8; *rpsM*, small subunit ribosomal protein S13. P: sequence available.

**Table S6.** Proteins from *DhMRE* showing BLAST hit against proteins from *Rhizophagus irregularis*. Proteins with an identity > 30% and a query coverage > 35% are shown in the table.

| Scaffold | <i>DhMRE</i> |                   |                  | <i>R. irregularis</i> |             |                   | BLAST result     |                   |             | Possible function/Domains <sup>c</sup> |         |                                      |
|----------|--------------|-------------------|------------------|-----------------------|-------------|-------------------|------------------|-------------------|-------------|----------------------------------------|---------|--------------------------------------|
|          | Gene number  | GC <sup>a</sup> % | CAI <sup>b</sup> | Prot. lenght (aa)     | Acc. number | GC <sup>a</sup> % | CAI <sup>b</sup> | Prot. lenght (aa) | Query cover |                                        | E value | Ident (%)                            |
| A        | 0417         | 31                | 0.222            | 381                   | EXX74175    | 22                | 0.194            | 788               | 0.55        | 4E <sup>-29</sup>                      | 38      | PUF_L domain like                    |
| A        | 0659         | 38                | 0.194            | 284                   | EXX58955    | 27                | 0.232            | 1437              | 0.97        | 3E <sup>-39</sup>                      | 37      | PUF_L domain like                    |
| A        | 0608*        | 31                | 0.233            | 507                   | EXX62832    | 28                | 0.349            | 571               | 0.41        | 2E <sup>-27</sup>                      | 39      | PUF_L domain like                    |
| A        | 0487         | 36                | 0.260            | 264                   | ESA21130    | 27                | 0.220            | 380               | 0.65        | 4E <sup>-21</sup>                      | 37      | PUF-RNI-like domain                  |
| A        | 0002         | 38                | 0.225            | 391                   | ESA09032    | 35                | 0.247            | 433               | 0.92        | 2E <sup>-125</sup>                     | 50      | PUF                                  |
| A        | 0032         | 31                | 0.234            | 279                   | ESA09071    | 32                | 0.221            | 292               | 0.82        | 3E <sup>-40</sup>                      | 39      | PUF-AIG1 domain                      |
| A        | 0522         | 30                | 0.236            | 564                   | ESA09071    | 32                | 0.221            | 292               | 0.45        | 2E <sup>-31</sup>                      | 34      | PUF-AIG1 domain                      |
| A        | 0172         | 38                | 0.153            | 217                   | EXX59421    | 39                | 0.145            | 140               | 0.6         | 5E <sup>-14</sup>                      | 37      | PUF                                  |
| A        | 0345         | 34                | 0.209            | 353                   | EXX67517    | 36                | 0.240            | 219               | 0.49        | 5E <sup>-6</sup>                       | 27      | PUF                                  |
| A        | 0022         | 32                | 0.201            | 553                   | ESA03387    | 24                | 0.227            | 331               | 0.52        | 4E <sup>-20</sup>                      | 31      | PUF                                  |
| A        | 0031         | 30                | 0.217            | 1,031                 | EXX75677    | 28                | 0.221            | 420               | 0.36        | 5E <sup>-107</sup>                     | 47      | Non-specific protein-tyrosine kinase |
| A        | 0091*        | 33                | 0.196            | 812                   | EXX53579    | 28                | 0.189            | 446               | 0.47        | 8E <sup>-105</sup>                     | 45      | Non-specific protein-tyrosine kinase |
| A        | 0349         | 32                | 0.245            | 787                   | EXX62449    | 27                | 0.224            | 495               | 0.44        | 3E <sup>-81</sup>                      | 41      | Non-specific protein-tyrosine kinase |
| A        | 0521         | .31               | 0.227            | 1,119                 | EXX52799    | 28                | 0.196            | 692               | 0.44        | 6E <sup>-84</sup>                      | 34      | Non-specific protein-tyrosine kinase |
| A        | 0574         | 32                | 0.226            | 766                   | EXX57629    | 28                | 0.223            | 467               | 0.52        | 5E <sup>-85</sup>                      | 40      | Non-specific protein-tyrosine kinase |
| A        | 0602*        | 34                | 0.209            | 551                   | EXX75398    | 27                | 0.210            | 477               | 0.8         | 2E <sup>-125</sup>                     | 46      | Non-specific protein-tyrosine kinase |

|   |      |    |       |     |          |    |       |     |      |                    |    |                                      |
|---|------|----|-------|-----|----------|----|-------|-----|------|--------------------|----|--------------------------------------|
| A | 0673 | 33 | 0.196 | 812 | EXX53579 | 28 | 0.189 | 446 | 0.47 | 1E <sup>-104</sup> | 45 | Non-specific protein-tyrosine kinase |
| B | 0015 | 33 | 0.244 | 204 | ESA20877 | 34 | 0.291 | 434 | 0.84 | 7E <sup>-33</sup>  | 41 | Conserved PUF-AIG1                   |
| B | 0016 | 34 | 0.283 | 448 | ESA07576 | 34 | 0.244 | 302 | 0.67 | 8E <sup>-78</sup>  | 47 | Conserved PUF-AIG1                   |
| B | 0018 | 31 | 0.210 | 348 | ESA09071 | 32 | 0.221 | 292 | 0.66 | 6E <sup>-53</sup>  | 44 | PUF-AIG1                             |
| B | 0019 | 32 | 0.204 | 479 | EXX77776 | 30 | 0.204 | 844 | 0.9  | 2E <sup>-57</sup>  | 38 | PUF-AIG1 domain                      |
| B | 0026 | 32 | 0.247 | 535 | EXX62915 | 25 | 0.201 | 434 | 0.68 | 5E <sup>-83</sup>  | 39 | Non-specific protein-tyrosine kinase |
| B | 0032 | 31 | 0.237 | 242 | ESA18820 | 30 | 0.230 | 226 | 0.94 | 7E <sup>-112</sup> | 74 | Conserved PUF                        |
| B | 0035 | 32 | 0.184 | 189 | ESA08495 | 41 | 0.247 | 103 | 0.53 | 6E <sup>-10</sup>  | 36 | PUF                                  |
| B | 0039 | 30 | 0.140 | 193 | EXX54862 | 26 | 0.226 | 623 | 0.59 | 5E <sup>-07</sup>  | 38 | PUF-L-Like domain                    |
| B | 0041 | 32 | 0.267 | 337 | EXX54859 | 26 | 0.226 | 740 | 0.57 | 6E <sup>-29</sup>  | 42 | PUF-L-Like domain                    |
| B | 0048 | 30 | 0.254 | 382 | EXX54862 | 26 | 0.226 | 623 | 0.56 | 1E <sup>-31</sup>  | 38 | PUF-LRR domain                       |

\* Proteins located in putative genomic islands

<sup>a</sup> The average GC content of the *DhmRE* genome is 34%

<sup>b</sup> CAI, codon adaptation index. The average CAI for a gene in *DhmRE* is 0.210. GC content and CAI were calculated using the Mobylye platform at <http://mobylye.pasteur.fr/cgi-bin/portal.py#welcome>

<sup>c</sup> PUF, protein of unknown function

<sup>d</sup> GI, genes associated to genomic islands.

**Table S7.** Set of 100 essential COGs conserved in 99% of bacteria (10).

| COG     | Code | COG's description                                                        | DhMRE |
|---------|------|--------------------------------------------------------------------------|-------|
| COG0563 | F    | Adenylate kinase and related kinases                                     | P     |
| COG0528 | F    | Uridylate kinase                                                         | A     |
| COG0587 | L    | DNA polymerase III, alpha subunit                                        | P     |
| COG2812 | L    | DNA polymerase III, gamma/tau subunits                                   | A     |
| COG0592 | L    | DNA polymerase sliding clamp subunit (PCNA homologous)                   | P     |
| COG0358 | L    | DNA primase (bacterial type)                                             | P     |
| COG0084 | L    | Mg-dependent DNase                                                       | P     |
| COG0305 | L    | Replicative DNA helicase                                                 | A     |
| COG0629 | L    | Single-stranded DNA-binding protein                                      | P     |
| COG0188 | L    | Type IIA topoisomerase (DNA gyrase/topo II, topoisomerase IV), A subunit | P     |
| COG0187 | L    | Type IIA topoisomerase (DNA gyrase/topo II, topoisomerase IV), B subunit | P     |
| COG0202 | K    | DNA-directed RNA polymerase, alpha subunit/40 kD subunit                 | P     |
| COG0086 | K    | DNA-directed RNA polymerase, beta' subunit/160 kD subunit                | P     |
| COG0568 | K    | DNA-directed RNA polymerase, sigma subunit (sigma70/sigma32)             | P     |
| COG0571 | K    | dsRNA-specific ribonuclease                                              | P     |
| COG0250 | K    | Transcription antiterminator                                             | P     |
| COG0195 | K    | Transcription elongation factor                                          | P     |
| COG0081 | J    | Ribosomal protein L1                                                     | P     |
| COG0244 | J    | Ribosomal protein L10                                                    | P     |
| COG0080 | J    | Ribosomal protein L11                                                    | P     |
| COG0102 | J    | Ribosomal protein L13                                                    | P     |
| COG0093 | J    | Ribosomal protein L14                                                    | P     |
| COG0200 | J    | Ribosomal protein L15                                                    | P     |
| COG0197 | J    | Ribosomal protein L16/L10E                                               | P     |
| COG0203 | J    | Ribosomal protein L17                                                    | P     |
| COG0256 | J    | Ribosomal protein L18                                                    | P     |
| COG0335 | J    | Ribosomal protein L19                                                    | P     |
| COG0090 | J    | Ribosomal protein L2                                                     | P     |
| COG0292 | J    | Ribosomal protein L20                                                    | P     |
| COG0091 | J    | Ribosomal protein L22                                                    | P     |
| COG0089 | J    | Ribosomal protein L23                                                    | P     |
| COG0198 | J    | Ribosomal protein L24                                                    | P     |
| COG0211 | J    | Ribosomal protein L27                                                    | P     |
| COG0087 | J    | Ribosomal protein L3                                                     | P     |
| COG0254 | J    | Ribosomal protein L31                                                    | P     |
| COG0088 | J    | Ribosomal protein L4                                                     | P     |
| COG0094 | J    | Ribosomal protein L5                                                     | P     |
| COG0097 | J    | Ribosomal protein L6P/L9E                                                | P     |
| COG0222 | J    | Ribosomal protein L7/L12                                                 | P     |
| COG0051 | J    | Ribosomal protein S10                                                    | P     |
| COG0100 | J    | Ribosomal protein S11                                                    | P     |
| COG0048 | J    | Ribosomal protein S12                                                    | P     |
| COG0099 | J    | Ribosomal protein S13                                                    | P     |
| COG0184 | J    | Ribosomal protein S15P/S13E                                              | P     |
| COG0228 | J    | Ribosomal protein S16                                                    | P     |
| COG0186 | J    | Ribosomal protein S17                                                    | P     |
| COG0238 | J    | Ribosomal protein S18                                                    | P     |
| COG0052 | J    | Ribosomal protein S2                                                     | P     |
| COG0268 | J    | Ribosomal protein S20                                                    | P     |
| COG0092 | J    | Ribosomal protein S3                                                     | P     |
| COG0522 | J    | Ribosomal protein S4 and related proteins                                | P     |
| COG0098 | J    | Ribosomal protein S5                                                     | P     |
| COG0360 | J    | Ribosomal protein S6                                                     | P     |
| COG0049 | J    | Ribosomal protein S7                                                     | P     |

|         |   |                                                                                                 |   |
|---------|---|-------------------------------------------------------------------------------------------------|---|
| COG0096 | J | Ribosomal protein S8                                                                            | P |
| COG0103 | J | Ribosomal protein S9                                                                            | P |
| COG0233 | J | Ribosome recycling factor                                                                       | P |
| COG0858 | J | Ribosome-binding factor A                                                                       | P |
| COG0013 | J | Alanyl-tRNA synthetase                                                                          | P |
| COG0018 | J | Arginyl-tRNA synthetase                                                                         | P |
| COG0215 | J | Cysteinyl-tRNA synthetase                                                                       | P |
| COG0008 | J | Glutamyl- and glutaminyl-tRNA synthetases                                                       | P |
| COG0124 | J | Histidyl-tRNA synthetase                                                                        | P |
| COG0060 | J | Isoleucyl-tRNA synthetase                                                                       | P |
| COG0495 | J | Leucyl-tRNA synthetase                                                                          | P |
| COG0143 | J | Methionyl-tRNA synthetase                                                                       | P |
| COG0016 | J | Phenylalanyl-tRNA synthetase alpha subunit                                                      | P |
| COG0072 | J | Phenylalanyl-tRNA synthetase beta subunit                                                       | P |
| COG0193 | J | Peptidyl-tRNA hydrolase                                                                         | P |
| COG0442 | J | Prolyl-tRNA synthetase                                                                          | P |
| COG0172 | J | Seryl-tRNA synthetase                                                                           | P |
| COG0441 | J | Threonyl-tRNA synthetase                                                                        | P |
| COG0180 | J | Tryptophanyl-tRNA synthetase                                                                    | P |
| COG0162 | J | Tyrosyl-tRNA synthetase                                                                         | P |
| COG0024 | J | Methionine aminopeptidase                                                                       | P |
| COG0336 | J | tRNA-(guanine-N1)-methyltransferase                                                             | P |
| COG0030 | J | Dimethyladenosine transferase (rRNA methylation)                                                | A |
| COG0012 | J | Predicted GTPase, probable translation factor                                                   | P |
| COG0216 | J | Protein chain release factor A                                                                  | P |
| COG0050 | J | GTPases – translation elongation factors                                                        | P |
| COG0231 | J | Translation elongation factor P (EF-P)/translation initiation factor 5A (eIF-5A)                | A |
| COG0264 | J | Translation elongation factor Ts                                                                | A |
| COG0480 | J | Translation elongation factors (GTPases)                                                        | P |
| COG0361 | J | Translation initiation factor 1 (IF-1)                                                          | P |
| COG0532 | J | Translation initiation factor 2 (IF-2; GTPase)                                                  | P |
| COG0290 | J | Translation initiation factor 3 (IF-3)                                                          | P |
| COG0465 | O | ATP-dependent Zn proteases                                                                      | P |
| COG0484 | O | DnaJ-class molecular chaperone with C-terminal Zn finger domain                                 | P |
| COG0533 | O | Metal-dependent proteases with possible chaperone activity                                      | P |
| COG0443 | O | Molecular chaperone                                                                             | P |
| COG0576 | O | Molecular chaperone GrpE (heat shock protein)                                                   | P |
| COG0691 | O | tmRNA-binding protein                                                                           | P |
| COG0653 | U | Preprotein translocase subunit SecA (ATPase, RNA helicase)                                      | P |
| COG0201 | U | Preprotein translocase subunit SecY                                                             | A |
| COG0706 | U | Preprotein translocase subunit YidC                                                             | A |
| COG0481 | M | Membrane GTPase LepA                                                                            | P |
| COG0275 | M | Predicted S-adenosylmethionine-dependent methyltransferase involved in cell envelope biogenesis | P |
| COG0536 | R | Predicted GTPase                                                                                | A |
| COG1160 | R | Predicted GTPases                                                                               | P |
| COG0319 | R | Predicted metal-dependent hydrolase                                                             | A |

Presence (P) or absence (A) of the COG in the DhMRE genome are indicated.



### 3. SUPPLEMENTARY FIGURES

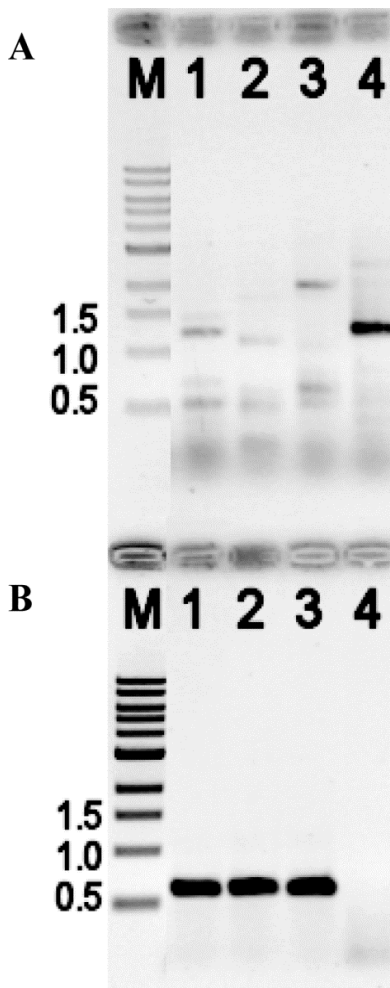

**Fig. S1. Figure S1. PCR amplification of bacterial 16S rRNA genes from AMF belonging to the Gigasporaceae.** DNA was amplified with MRE specific primers (A; 1.4 kb amplicon expected) and *Ca. Glomeribacter gigasporarum* (*Burkholderia*-related) specific primers (B; 0.7 kb amplicon). (M) marker; (1) *Gigaspora decipiens* AU102, (2, 3) two different *Gigaspora margarita* isolates, (4) *Dentiscutata heterogama* FL654. *Dentiscutata heterogama* spores are free from *Ca. Glomeribacter gigasporarum*, but contain the Mollicutes-related endobacteria which were target of this study. As the degenerate MRE primers used cause some unspecific products, MRE amplicons were cloned and sequenced to confirm their origin.

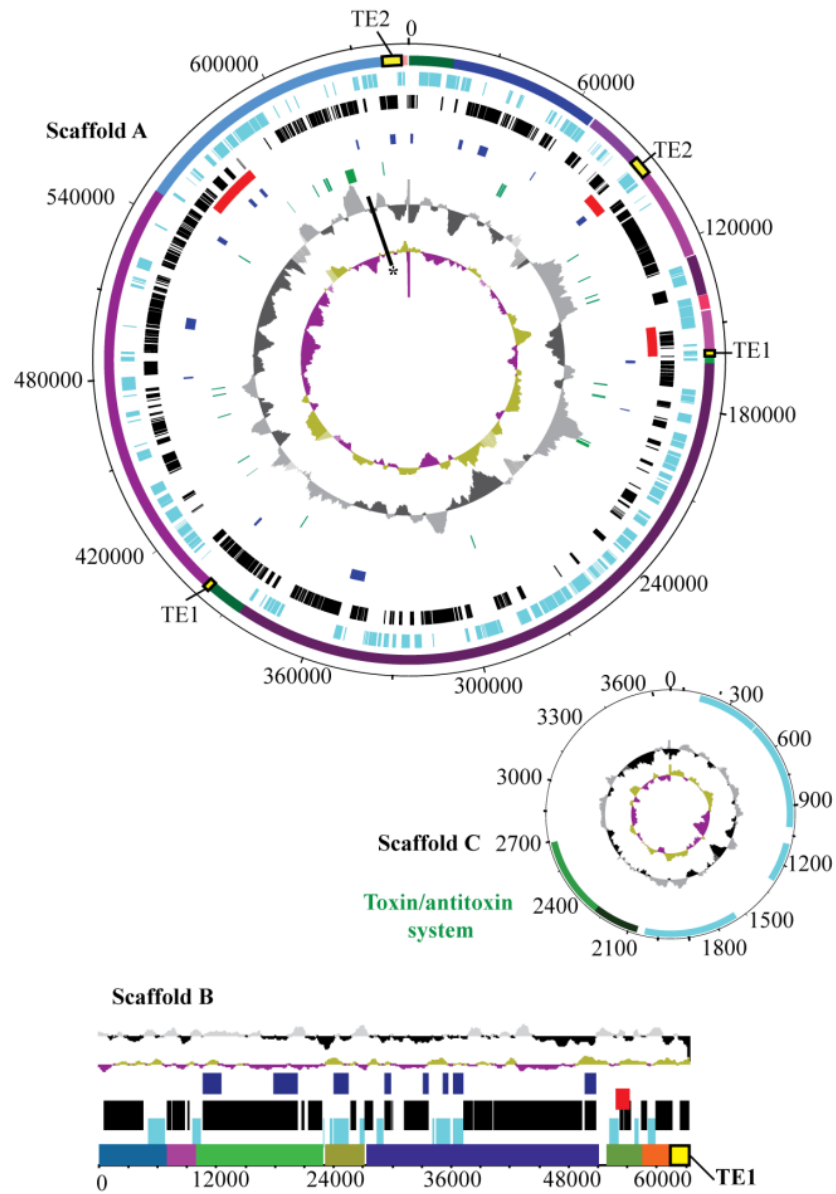

**Fig. S2. Visualization of the *DhMRE* genome draft assembly.** Tracks from the outside to the inside represent: i) Contigs constituting the genome draft assembly, ii) location of gene models: in blue forward CDSs and in black reverse CDSs, iii) genomic islands in red, iv) *DhMRE* candidate-genes for horizontal gene transfer between the AMF host and *DhMRE* in dark blue, v) rRNA and tRNA genes in green, and in the inner tracks % GC plot and GC skew ( $[GC]/[G+C]$ ). TE; transposable elements 1 and 2 are marked in yellow. \*OriC predicted by GC skew in scaffold A.

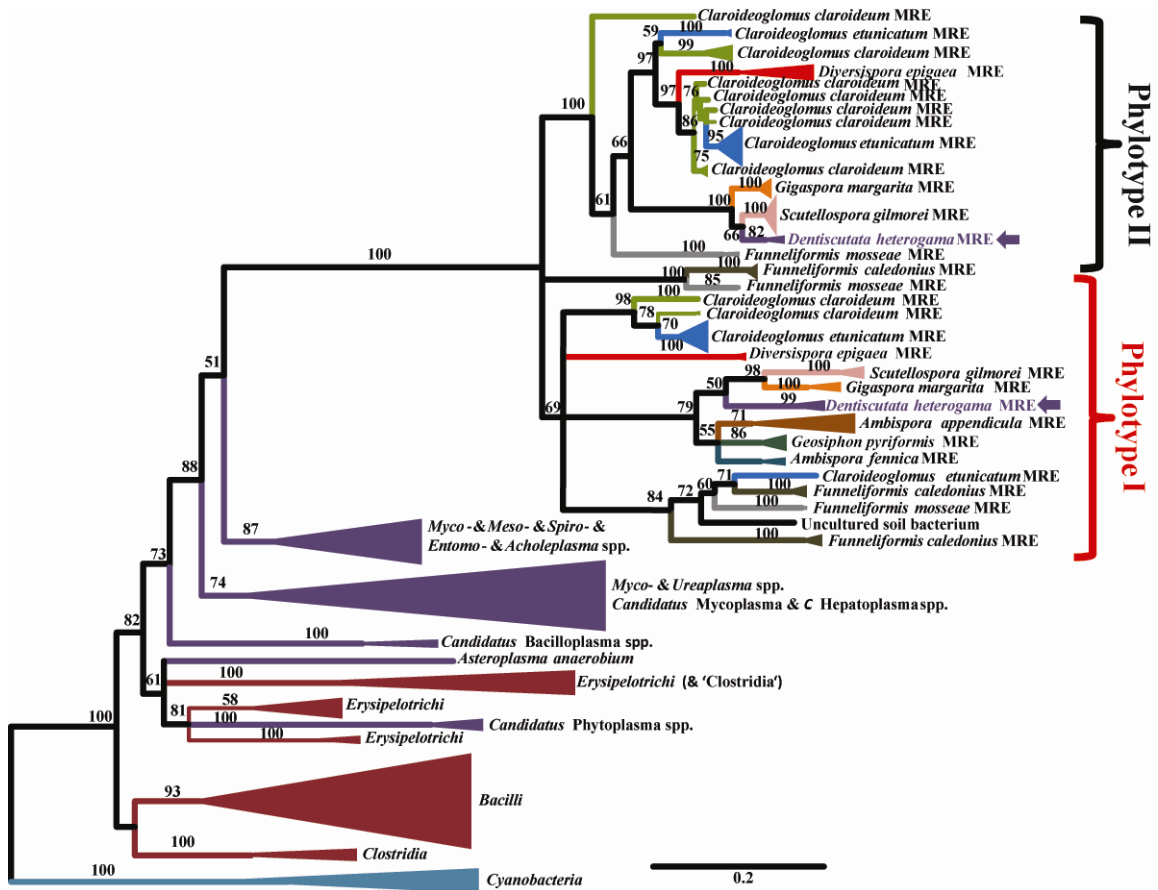

**Fig. S3. Phylogeny based on the 16S rRNA gene sequences obtained from AMF spores DNA extracts.** *DhMRE* 16S rRNA gene sequences are related to the *Mollicutes* (purple); *Cyanobacteria* sequences were used as outgroup. The tree shows two main groups of MRE (phylotype I and phylotype II). MRE used in this project are indicated with an arrow and are endosymbionts of *Dentiscutata heterogama* (syn. *Scutellospora heterogama*) FL654.

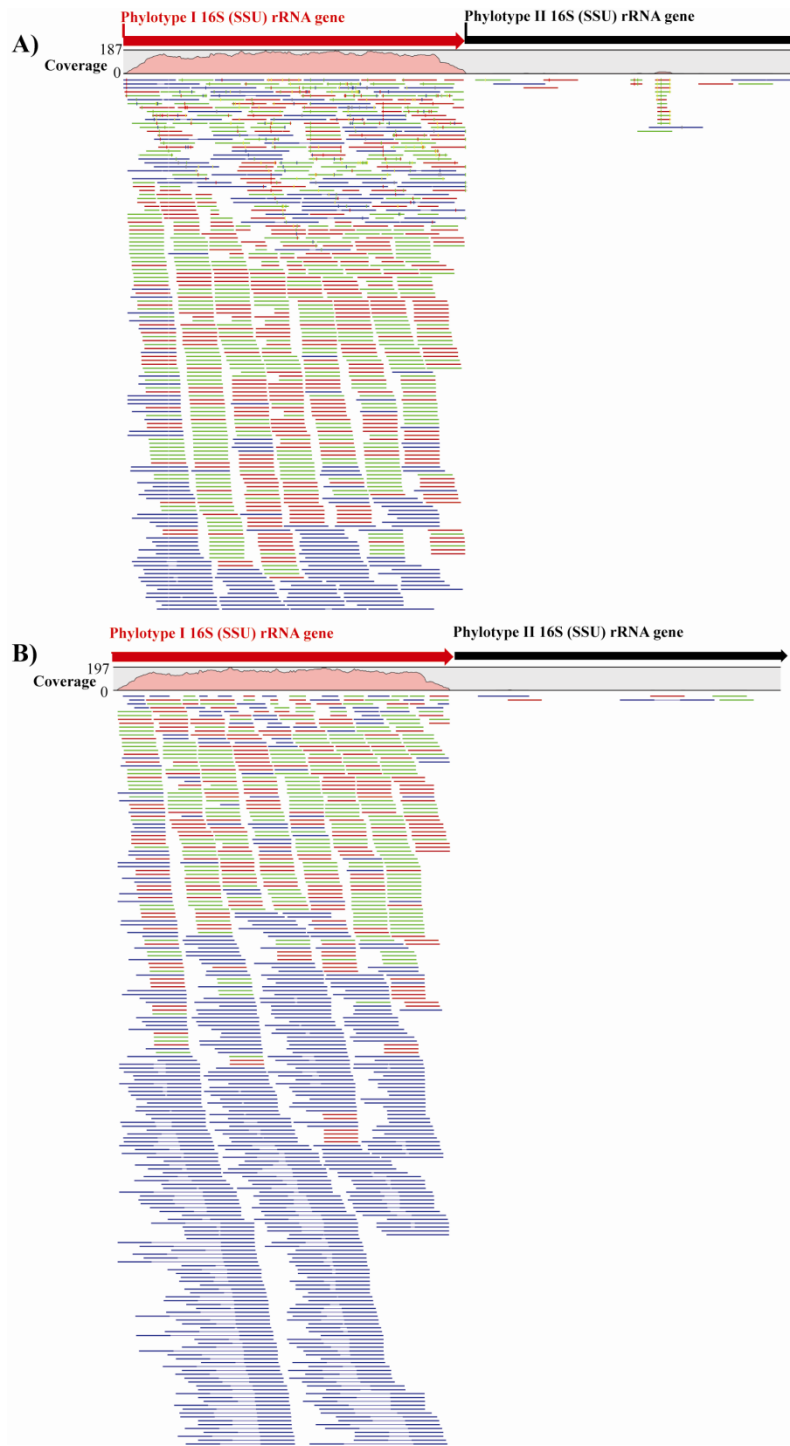

**Fig. S4. Raw reads mapping against the 16S rRNA gene sequences of the two *DhmRE* phlotypes used as a reference.** Raw data reads were mapped against the reference sequences with A) 95 % and B) 100 % sequence similarity and length coverage as criteria. Green, red and blue color corresponds to forward, reverse and paired-end reads respectively. Read coverage is shown in the upper part of the figure.

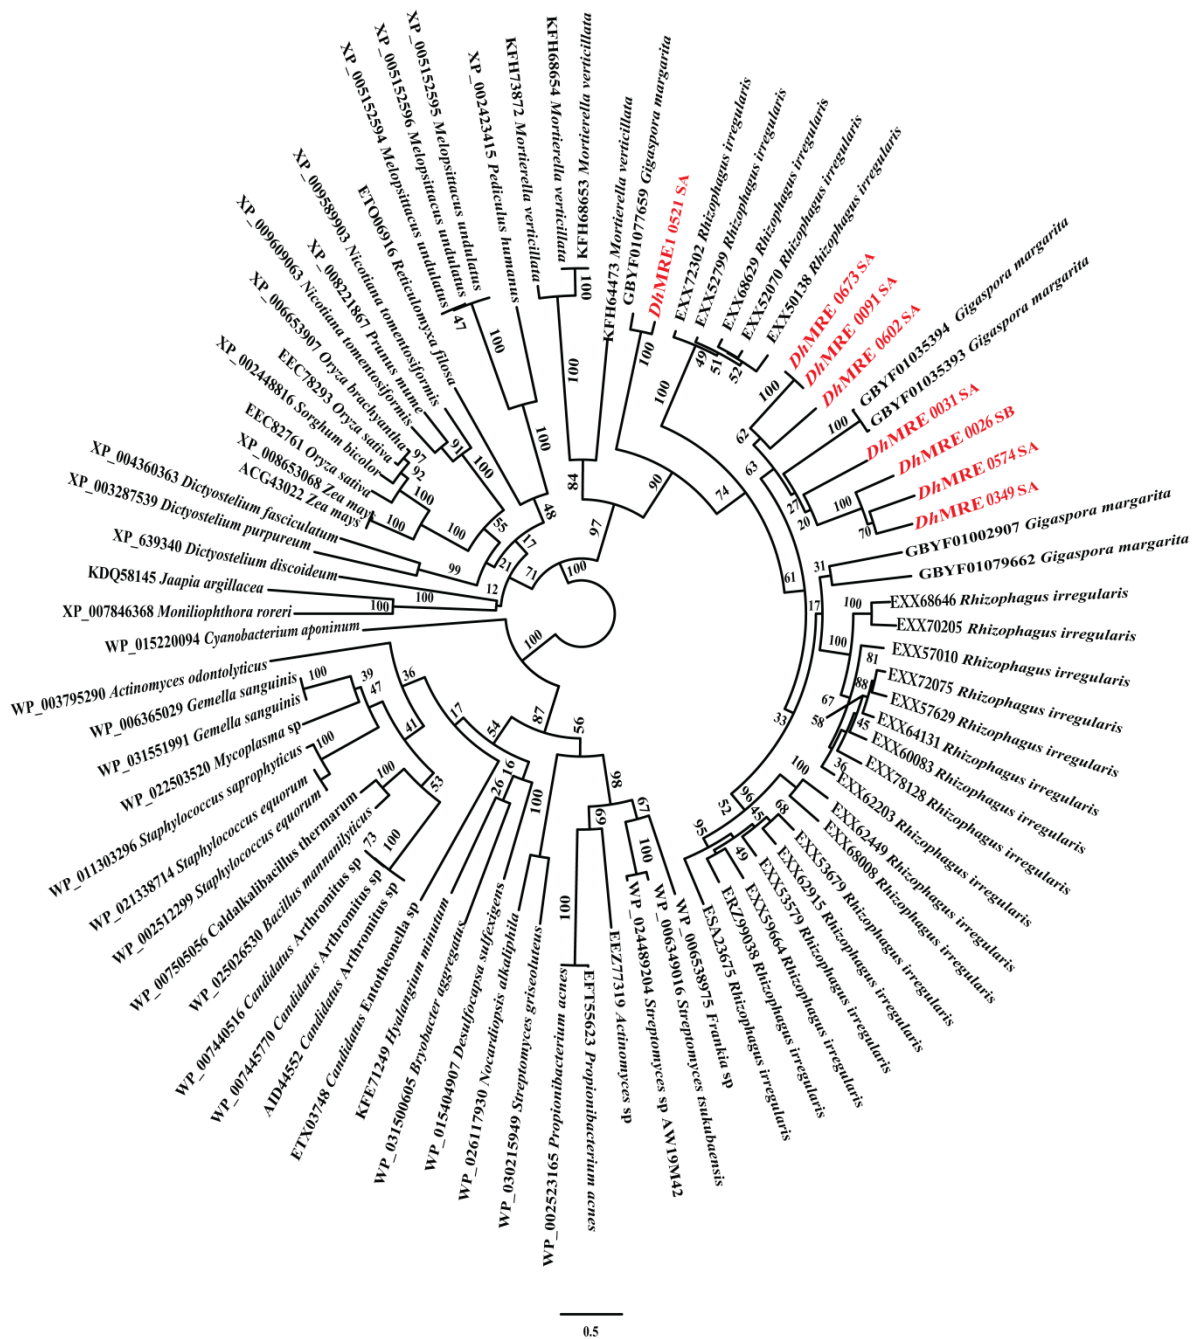

**Fig. S5. Phylogenetic reconstruction based on the tyrosine kinase domain of the protein kinases described in the *DhMre* genome draft.** Maximum likelihood phylogenetic tree computed using 100 bootstraps. SA, scaffold A; SB, scaffold B.

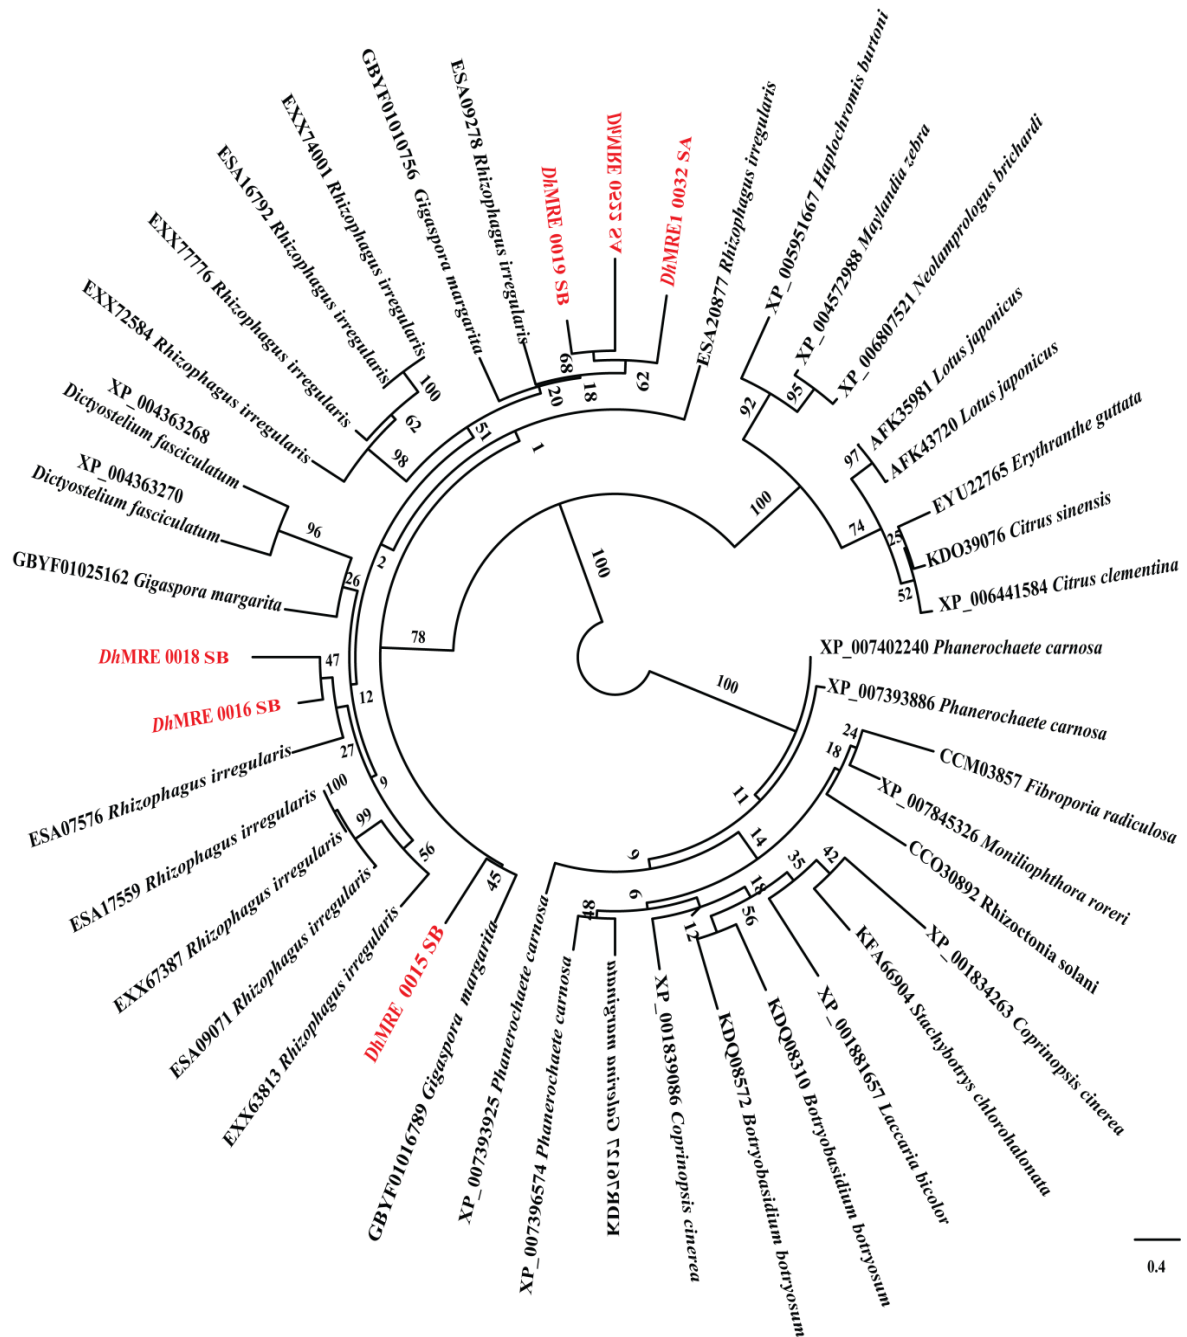

**Fig. S6. Phylogenetic reconstruction based on the AIG domain of the proteins described in the *DhMre* genome draft.** Maximum likelihood phylogenetic tree computed using 100 bootstraps. SA, scaffold A; SB, scaffold B.

| Scaffold | Gene number | Predicted function                 | Length (aa) | Structure |
|----------|-------------|------------------------------------|-------------|-----------|
| A        | 0149        | exported PUF                       | 417         |           |
| A        | 0093        | PUF                                | 322         |           |
| A        | 0256        | PUF                                | 336         |           |
| A        | 0265        | PUF                                | 381         |           |
| A        | 0490        | PUF                                | 136         |           |
| A        | 0606        | PUF                                | 794         |           |
| A        | 0608        | PUF                                | 507         |           |
| A        | 0065        | PUF                                | 430         |           |
| A        | 0133        | PUF                                | 315         |           |
| B        | 0046        | PUF                                | 770         |           |
| B        | 0047        | PUF                                | 2107        |           |
| B        | 0048        | PUF                                | 381         |           |
| A        | 0134        | PUF                                | 329         |           |
| A        | 0136        | PUF                                | 406         |           |
| A        | 0417        | PUF                                | 381         |           |
| A        | 0659        | PUF                                | 248         |           |
| B        | 0039        | PUF                                | 192         |           |
| B        | 0041        | PUF                                | 336         |           |
| B        | 0015        | PUF                                | 1758        |           |
| A        | 0487        | PUF                                | 264         |           |
| B        | 0015        | conserved PUF                      | 203         |           |
| B        | 0016        | conserved PUF                      | 447         |           |
| B        | 0018        | conserved PUF                      | 347         |           |
| B        | 0019        | PUF                                | 478         |           |
| A        | 0091        | Non-specific PTK                   | 812         |           |
| A        | 0623        | PUF                                | 107         |           |
| A        | 0580        | Peptidase SUMO                     | 753         |           |
| A        | 0603        | exported Sentrin-specific protease | 254         |           |
| B        | 0044        | PUF                                | 666         |           |

**Fig. S7. Proteins with eukaryotic domains in *DhmRE* genome.** The structure of each protein was inferred from the domain description of the SUPERFAMILY database (11).

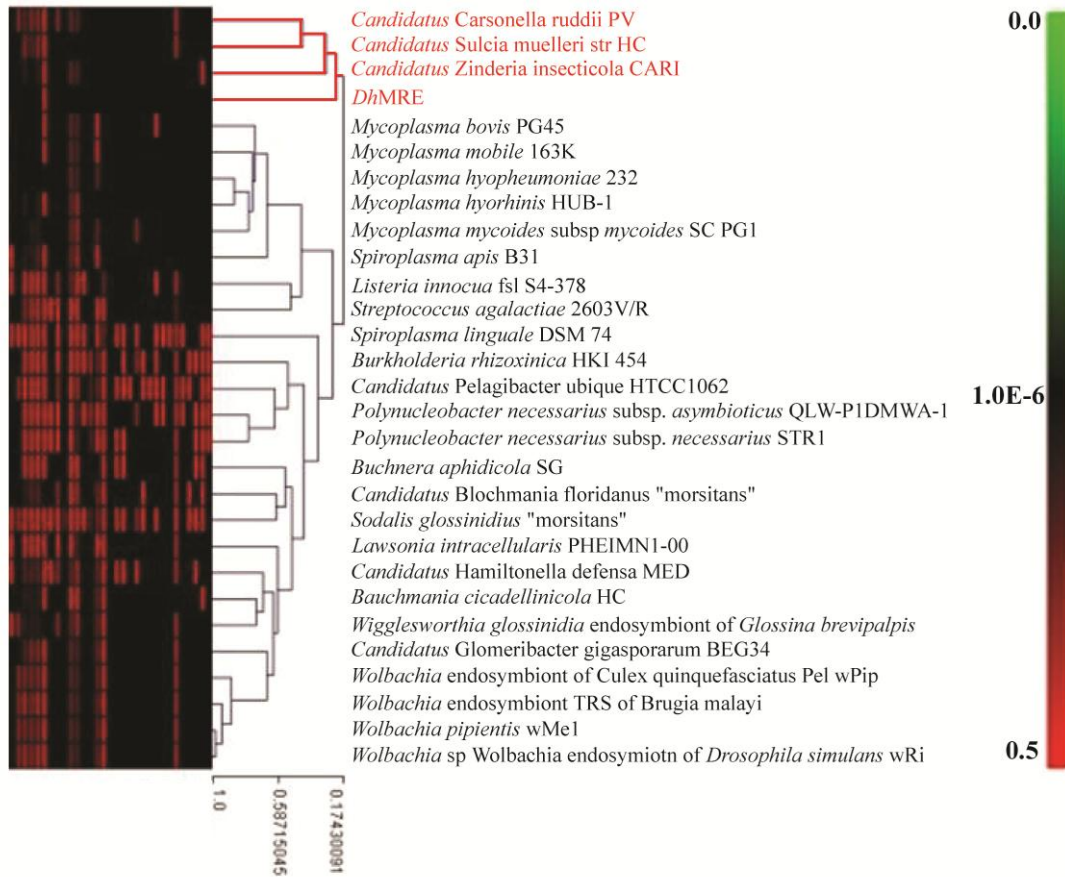

**Fig. S8. Hierarchical clustering of KEGG metabolic pathways calculated for *DhMRE* and other 29 bacteria. *DhMRE* clusters with obligate endosymbionts of insects with reduced metabolic capacities due to its very low pathway completion values, similar to *Ca. Carsonella ruddii*, *Ca. Dulcia muelleri* and *Ca. Zinderia insecticola*.**



#### 4. REFERENCES

1. Tisserant E, *et al.* (2013) Genome of an arbuscular mycorrhizal fungus provides insight into the oldest plant symbiosis. *Proc Natl Acad Sci USA* 110 (50):20117-20122.
2. Albertsen M, *et al.* (2013) Genome sequences of rare, uncultured bacteria obtained by differential coverage binning of multiple metagenomes. *Nat Biotechnol* 31(6):533-538.
3. Smoot ME, Ono K, Ruscheinski J, Wang PL, Ideker T (2011) Cytoscape 2.8: new features for data integration and network visualization. *Bioinformatics* 27(3):431-432.
4. Nijveen H, van Kaauwen M, Esselink DG, Hoegen B, Vosman B (2013) QualitySNPng: a user-friendly SNP detection and visualization tool. *Nucleic Acids Res* 41(Web Server issue):W587-590.
5. Chevreux B, *et al.* (2004) Using the miraEST assembler for reliable and automated mRNA transcript assembly and SNP detection in sequenced ESTs. *Genome Res* 14(6):1147-1159.
6. Teeling H, Waldmann J, Lombardot T, Bauer M, Glockner F (2004) TETRA: a web-service and a stand-alone program for the analysis and comparison of tetranucleotide usage patterns in DNA sequences. *BMC Bioinformatics* 5(1):163.
7. Carver T, Thomson N, Bleasby A, Berriman M, Parkhill J (2009) DNAPlotter: circular and linear interactive genome visualization. *Bioinformatics* 25(1):119-120.
8. Vallenet D, *et al.* (2013) MicroScope--an integrated microbial resource for the curation and comparative analysis of genomic and metabolic data. *Nucleic Acids Res* 41(Database issue):636-647.
9. Barré A, de Daruvar A, Blanchard A (2004) MolliGen, a database dedicated to the comparative genomics of *Mollicutes*. *Nucleic Acids Res* 32(suppl 1):307-310.
10. Merhej V, Royer-Carenzi M, Pontarotti P, Raoult D (2009) Massive comparative genomic analysis reveals convergent evolution of specialized bacteria. *Biology Direct* 4(1):13.
11. Wilson D, Madera M, Vogel C, Chothia C, Gough J (2007) The SUPERFAMILY database in 2007: families and functions. *Nucleic Acids Res* 35(suppl 1):308-313.
